# Supplementary material
Source: PubMed Central journal article supplement (PMC1896200)
Supplement: pmed.0040202.sg001.pdf [file pmed.0040202.sg001.pdf]

## Sensitivity (95% CI)

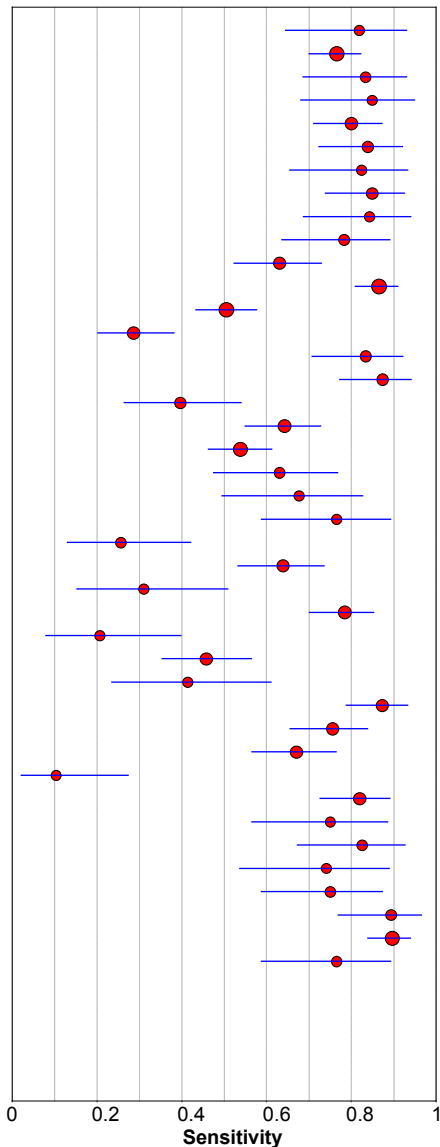

| Test                      | Sensitivity | 95% CI        |
|---------------------------|-------------|---------------|
| Anda IgA (41)             | 0.82        | (0.65 - 0.93) |
| Anda IgG (38)             | 0.77        | (0.70 - 0.82) |
| Anda IgG (40)             | 0.83        | (0.69 - 0.93) |
| Anda IgG (41)             | 0.85        | (0.68 - 0.95) |
| Anda IgG (51)             | 0.80        | (0.71 - 0.87) |
| Anda IgG (52)             | 0.84        | (0.72 - 0.92) |
| Anda IgG (56)             | 0.82        | (0.65 - 0.93) |
| Anda IgG (59)             | 0.85        | (0.74 - 0.92) |
| Anda IgG (61)             | 0.84        | (0.69 - 0.94) |
| Anda IgG (62)             | 0.78        | (0.64 - 0.89) |
| Anda IgG (64)             | 0.63        | (0.52 - 0.73) |
| Anda IgG/IgM (38)         | 0.87        | (0.81 - 0.91) |
| Anda IgM (38)             | 0.51        | (0.43 - 0.58) |
| Anda IgM (51)             | 0.29        | (0.20 - 0.38) |
| Detect TB (42)            | 0.83        | (0.71 - 0.92) |
| ICT (55)                  | 0.87        | (0.77 - 0.94) |
| ICT (57)                  | 0.40        | (0.26 - 0.54) |
| ICT (58)                  | 0.64        | (0.55 - 0.73) |
| KAT (45)                  | 0.54        | (0.46 - 0.61) |
| MycoDot (43)              | 0.63        | (0.48 - 0.77) |
| MycoDot (43)              | 0.68        | (0.49 - 0.83) |
| MycoDot (56)              | 0.76        | (0.59 - 0.89) |
| MycoDot (60)              | 0.26        | (0.13 - 0.42) |
| P Plus (44)               | 0.64        | (0.53 - 0.73) |
| P Plus (49)               | 0.31        | (0.15 - 0.51) |
| P Plus (63)               | 0.78        | (0.70 - 0.85) |
| Path Myco A (49)          | 0.21        | (0.08 - 0.40) |
| Path Myco G (44)          | 0.46        | (0.35 - 0.56) |
| Path Myco G (49)          | 0.41        | (0.24 - 0.61) |
| Path Myco G/M/P Plus (44) | 0.87        | (0.79 - 0.93) |
| Path Myco G/P Plus (44)   | 0.76        | (0.66 - 0.84) |
| Path Myco M (44)          | 0.67        | (0.57 - 0.76) |
| Path Myco M (49)          | 0.10        | (0.02 - 0.27) |
| Path Myco M/P Plus (44)   | 0.82        | (0.73 - 0.89) |
| TB IgA EIA (39)           | 0.75        | (0.57 - 0.89) |
| TB IgA EIA (46)           | 0.83        | (0.67 - 0.93) |
| TB IgA EIA (50)           | 0.74        | (0.54 - 0.89) |
| TB IgG EIA (46)           | 0.75        | (0.59 - 0.87) |
| TBGL (47)                 | 0.89        | (0.77 - 0.96) |
| TBGL (54)                 | 0.90        | (0.84 - 0.94) |
| TBGL (56)                 | 0.76        | (0.59 - 0.89) |
