# Supplementary material
Source: PubMed Central journal article supplement (PMC1896200)
Supplement: pmed.0040202.sg006.pdf [file pmed.0040202.sg006.pdf]

**A**

Sensitivity

SROC Curve

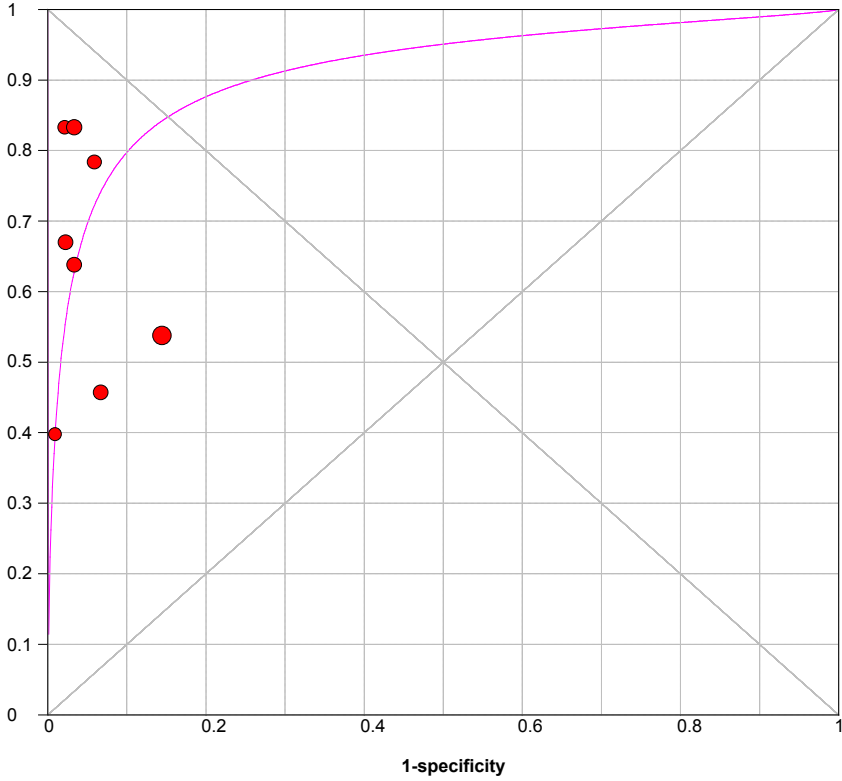**Asymmetric SROC**

AUC = 0.9131

SE(AUC) = 0.0937

Q\* = 0.8478

SE(Q\*) = 0.0918

**B**

Sensitivity

SROC Curve

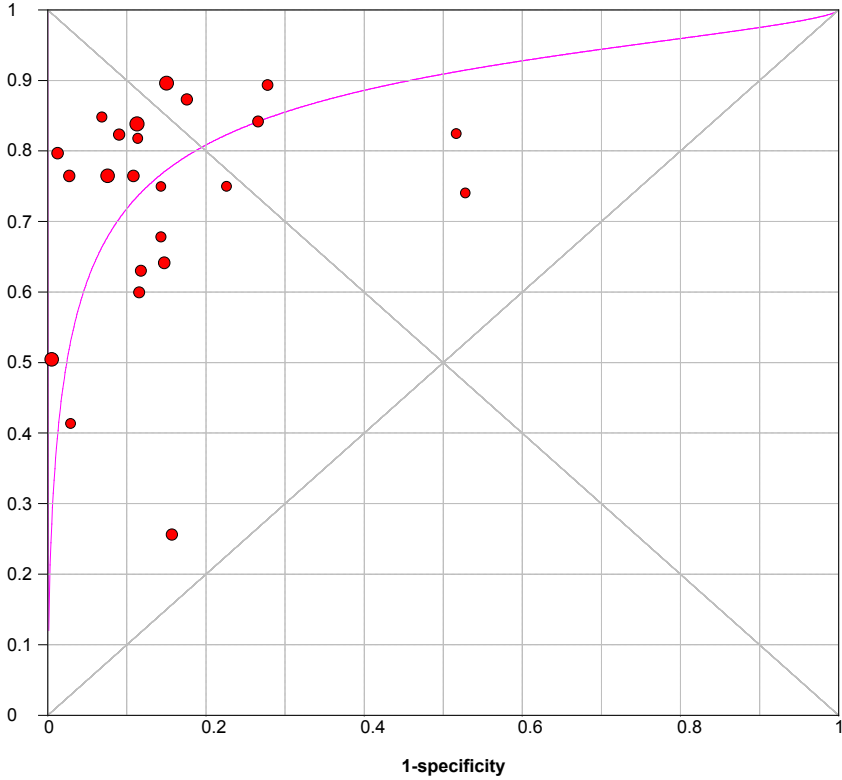**Asymmetric SROC**

AUC = 0.8702

SE(AUC) = 0.0249

Q\* = 0.8053

SE(Q\*) = 0.0212
