# Supplementary material
Source: PubMed Central journal article supplement (PMC1896200)

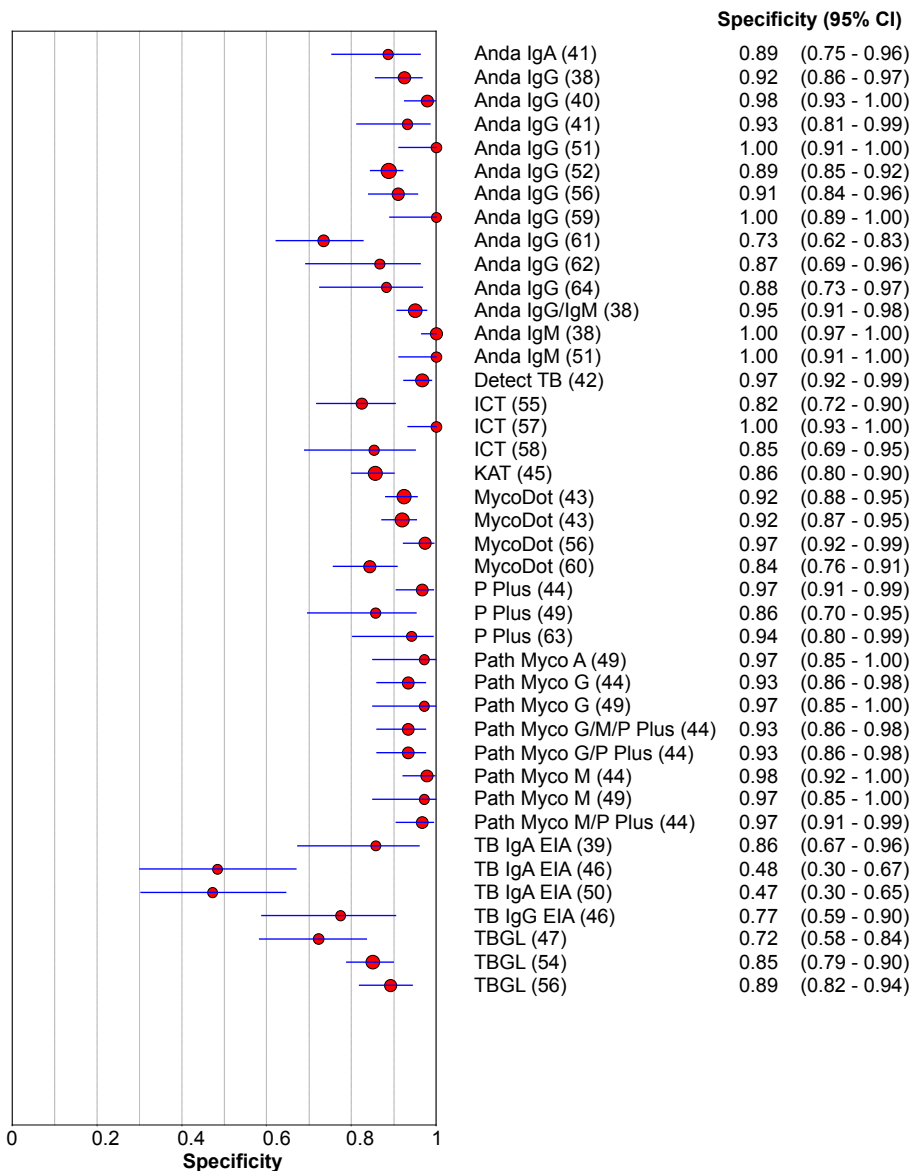

Supplement: pmed.0040202.sg002.pdf [file pmed.0040202.sg002.pdf]

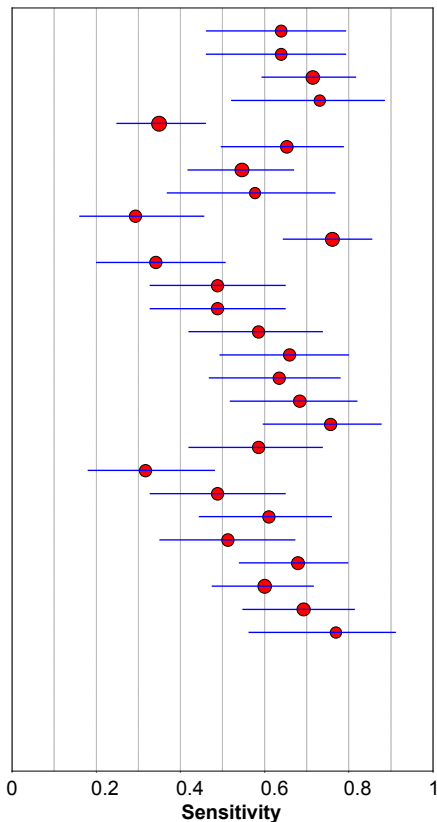

Supplement: pmed.0040202.sg003.pdf [file pmed.0040202.sg003.pdf]

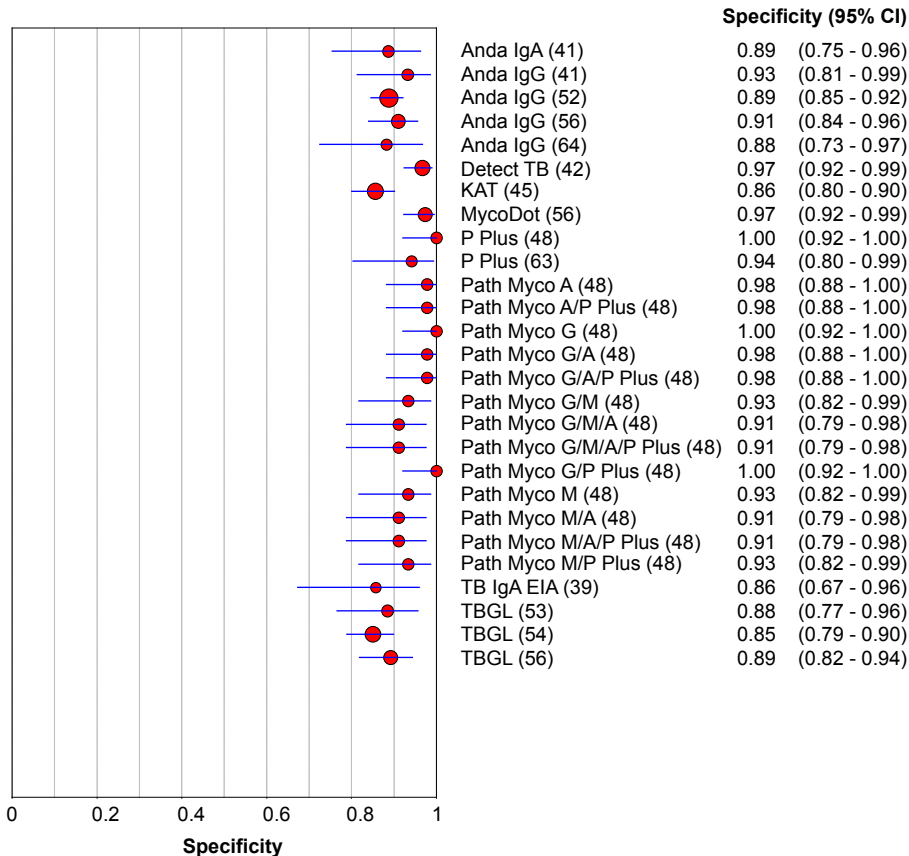

Supplement: pmed.0040202.sg004.pdf [file pmed.0040202.sg004.pdf]
